# Supplementary material for: European Corn Borer (Ostrinia nubilalis) Induced Responses Enhance Susceptibility in Maize
Source: PubMed Central journal article supplement (PMC3759431; doi:10.1371/journal.pone.0073394), 2013-09-02
Supplement: pone.0073394.s006.pdf [file pone.0073394.s006.pdf]

**Supplemental Table IV. Primer sequences used for qRT-PCR analyses**

| <b>Symbol</b>   | <b>NCBI</b>          |                        |                          | <b>Amplification Size (bp)</b> |
|-----------------|----------------------|------------------------|--------------------------|--------------------------------|
|                 | <b>Accession No.</b> | <b>Forward Primer</b>  | <b>Reverse Primer</b>    |                                |
| <i>Pr10</i>     | NM_001137540         | GTTTCTGCTACCTGTCTGACC  | TGTACCTGATGCACTGCTTG     | 93                             |
| <i>Sh-1</i>     | NM_001111941         | ACTGATAGCACTCTTTCCAGG  | GGGTGCATACTTCTCCTTGTC    | 115                            |
| <i>Lox1</i>     | DQ335760             | TCGTCGCACTAGTTGTTTGC   | TCCTCACGTAGCGACTTCTG     | 112                            |
| <i>Lox2</i>     | DQ335761             | TCCTGGAAGGCTACCTCCTC   | ACCATCTGTAGCGGGAAGT      | 132                            |
| <i>Mpi</i>      | EU972028             | GGTGATTCTGGCGGACAAG    | ACACGGTCGAACCCAAAG       | 90                             |
| <i>Abp20</i>    | NM_001137400         | CACTTCCAGTACAGCCACG    | CACCTTGTTCCAGACCTCC      | 132                            |
| <i>GH3</i>      | NM_001158280         | AGATGCCCGTAATGAACCTG   | GTTCTTGAAGTGTTGCTCTTG    | 149                            |
| <i>Enod93-1</i> | NM_001138337         | TGAACATCGATCTGCTACTGC  | GACCACATAAGCGTACTAGGG    | 143                            |
| <i>Enod93-2</i> | NM_001153581         | GCACCTCAAGAACACCTCC    | ACTGACGAACTGAAAGAGGC     | 116                            |
| <i>Gpc3/4</i>   | U45856               | GGTGTC AACGAGAAGGAGTAC | AGTGATGGCATGAACAGTGG     | 147                            |
| <i>ETIF</i>     | NM_001157877         | AGCCAAGAGAAGTGGTGC     | TTCCTTAAGATCCACCTTCAGAAG | 149                            |
| <i>HD</i>       | NM_001111607         | CCTGGTGTCAAATGCAAGAG   | TGTCATTGTCACCTTCATAGTACC | 148                            |
| <i>RpL17</i>    | AF034948             | CTGAGGGTCCACTTCAAGAAC  | CAACACCTCCACAGTATCTCC    | 139                            |
